# Supplementary material for: Vapor Phosphorylation of Cellulose by Phosphorus Trichlo-Ride: Selective Phosphorylation of 6-Hydroxyl Function—The Synthesis of New Antimicrobial Cellulose 6-Phosphate(III)-Copper Complexes
Source: Antibiotics (Basel). 2021 Feb 19;10(2):203. doi: 10.3390/antibiotics10020203 (PMC7923017; doi:10.3390/antibiotics10020203)
Supplement: Supplementary file 1 [file antibiotics-10-00203-s001.pdf]

# Vapor Phosphorylation of Cellulose by Phosphorus Trichloride: Selective Phosphorylation of 6-Hydroxyl Function. The Synthesis of New Antimicrobial Cellulose 6-Phosphate(III)-Copper Complexes.

Marcin H. Kudzin<sup>1</sup>, Zdzisława Mrozińska<sup>1</sup> and Paweł Urbaniak<sup>2</sup>

<sup>1</sup> Łukasiewicz Research Network—Textile Research Institute, Brzezinska 5/15, Lodz 92-103, Poland; zmrozinska@iw.lodz.pl

<sup>2</sup> Faculty of Chemistry, University of Lodz, Tamka 12, Lodz 90-136, Poland; pawel.urbania@chemia.uni.lodz.pl

## 1. Phosphorylation of cellulose

The phosphorylation reactions of the cellulose in the exposure of phosphorus trichloride ( $\text{PCl}_3$ ) were carried out in the set consisting of two glass weighing bottles: the larger one (D vs. H: 40 mm × 40 mm), and the inner vessel (D vs. H: 20 mm × 20 mm). A 0.05 g portion of cellulose was poured into the inner vessel (Figure. 1a). Raschig rings were placed in the larger bottle (h = 1 cm), then  $\text{PCl}_3$  (1 ml) was added (Figure. 1b), followed by placing the inner vessel (with cellulose) into the bottle with  $\text{PCl}_3$ , followed and the whole closing with a lid (Figure. 1c).

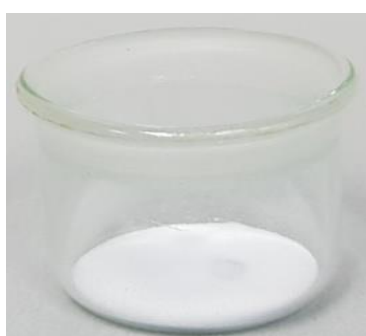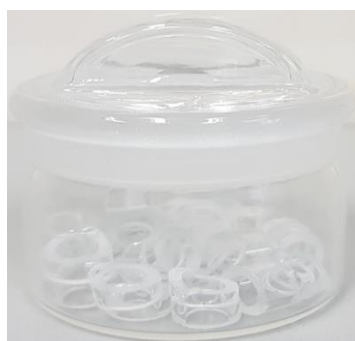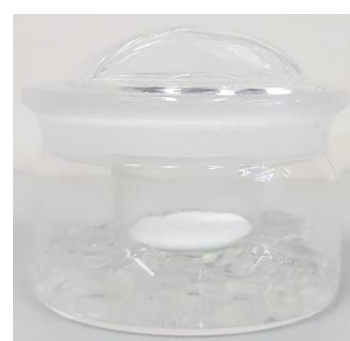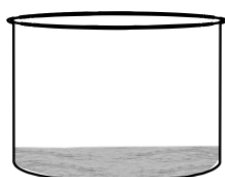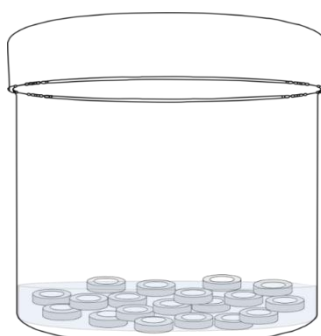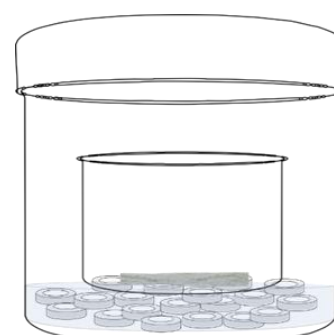

(a). (b) (c)

**Figure S1.** Assembly of the reactor for conducting phosphorylation reaction with  $\text{PCl}_3$  vapors: (a) inner vessel with cellulose sample, (b) bottle with  $\text{PCl}_3$ , (c) phosphorylation reaction reactor.

## 2. Antimicrobial Activity

The antibacterial activity of the  $\text{Cell-O}^6\text{-P(O)(O-)-H} \times \text{Cu}^{2+}$  was tested according to EN ISO 20645:2006. *Textile Fabrics. Determination of Antibacterial Activity—Agar Diffusion Plate Test* [78]. Gram-negative bacteria *E. coli* (ATCC 25922) and Gram-positive bacteria *S. aureus* (ATCC 6538) were used as model bacteria in this study. Antibacterial activity of  $\text{Cell-O}^6\text{-P(O)(O-)-H} \times \text{Cu}^{2+}$  complex was tested by the agar diffusion method using Muller Hinton medium agar. The test was initiated by pouring each agar onto sterilized Petri dishes and allowing it to solidify. The surface of the growth media was inoculated by overnight broth cultures of bacteria ( $0.4 \times 10^8 \text{ CFU mL}^{-1}$ ). Samples of modified cellulose were placed onto the inoculated agar and incubated at  $37^\circ\text{C}$  for 24 h. The diameter of the clear zone around the sample was measured as an indication of growth inhibition. All tests were carried out in duplicate. Simultaneously, the same tests were carried out as control samples with samples of unmodified cellulose or  $\text{Cell-O}^6\text{-P(O)(O-)-H}$ .
